# Supplementary material
Source: publisher site journal article supplement (https://www.dovepress.com/article/577342)
Supplement: Supplementary file 1 [file 577342_Supplementary%20tables_1.docx]

**Table S1. Knowledge**

| **Items, n (%)** | **Correctness rate** |
| --- | --- |
| **1.Acupuncture can relieve symptoms such as knee swelling and pain and improve knee joint function.** | 261 (77.45) |
| **2.Compared to oral Western medicine and surgery, acupuncture has unique advantages such as affordability, safety, simplicity, ease of application, and fewer adverse reactions.** | 267 (79.23) |
| **3.Acupuncture can relax tendons, activate meridians, relieve pain, and reduce local knee swelling and aseptic inflammation.** | 275 (81.6) |
| **4.Moxibustion therapy can accelerate metabolism at the lesion site, relieve local muscle spasms, and warm the meridians to alleviate pain.** | 265 (78.64) |
| **5.Common acupuncture therapies include filiform needles, fire needles, electroacupuncture, warm acupuncture, needle-knife therapy, and moxibustion.** | 197 (58.46) |
| **6.The Qici (multi-directional needling) technique of filiform needles is particularly effective for treating larger areas.** | 4 (1.19) |
| **7.Warm acupuncture therapy involves heating a specially designed needle until red-hot and quickly inserting it into acupuncture points or affected areas for treatment.** | 21 (6.23) |
| **8.Electroacupuncture therapy applies pulse currents from an electroacupuncture device to meridians and acupuncture points via filiform needles.** | 215 (63.8) |
| **9.Fire needle therapy combines needling and moxibustion in its application.** | 13 (3.86) |
| **10.Needle-knife therapy involves deep insertion into treatment points to dissect adhesions, thereby unblocking meridians and collaterals.** | 178 (52.82) |
| **11.Moxibustion works by utilizing the physical and chemical effects produced by burning moxa sticks or moxa cones.** | 256 (75.96) |
| **12.Acupuncture needles are always single-use and disposable.** | 26 (7.72) |

**Table S2. Attitude**

| **Items, n (%)** | **Strongly agree** | **Agree** | **Neutral** | **Disagree** | **Strongly disagree** |
| --- | --- | --- | --- | --- | --- |
| **1.I believe acupuncture is noticeably painful.** | 58 (17.21) | 96 (28.49) | 137 (40.65) | 40 (11.87) | 6 (1.78) |
| **2.I think acupuncture requires long-term treatment, and adhering to it is inconvenient.** | 41 (12.17) | 100 (29.67) | 124 (36.8) | 59 (17.51) | 13 (3.86) |
| **3.I believe acupuncture can relieve discomfort.** | 124 (36.8) | 168 (49.85) | 41 (12.17) | 3 (0.89) | 1 (0.3) |
| **4.I believe acupuncture has no serious side effects.** | 120 (35.61) | 140 (41.54) | 62 (18.4) | 7 (2.08) | 8 (2.37) |
| **5.I think acupuncture is highly effective in treating osteoarthritis.** | 83 (24.63) | 151 (44.81) | 97 (28.78) | 5 (1.48) | 1 (0.3) |
| **6.If a doctor recommends acupuncture treatment, I would accept it.** | 107 (31.75) | 184 (54.6) | 37 (10.98) | 7 (2.08) | 2 (0.59) |
| **7.I believe acupuncture costs exceed my budget.** | 20 (5.93) | 52 (15.43) | 175 (51.93) | 74 (21.96) | 16 (4.75) |
| **8.If the acupuncture clinic is too far, I would not want to go.** | 42 (12.46) | 117 (34.72) | 120 (35.61) | 46 (13.65) | 12 (3.56) |
| **9.Compared to taking medication, I prefer acupuncture therapy.** | 93 (27.6) | 143 (42.43) | 81 (24.04) | 16 (4.75) | 4 (1.19) |
| **10.I feel fearful of acupuncture therapy.** | 24 (7.12) | 56 (16.62) | 83 (24.63) | 126 (37.39) | 48 (14.24) |

**Table S3. Practice**

| **Items, n (%)** | **Always** | **Often** | **Sometimes** | **Rarely** | **Never** |
| --- | --- | --- | --- | --- | --- |
| **1.I regularly undergo acupuncture treatment.** | 32 (9.5) | 72 (21.36) | 119 (35.31) | 73 (21.66) | 41 (12.17) |
| **2.I actively seek information about acupuncture.** | 55 (16.32) | 76 (22.55) | 105 (31.16) | 75 (22.26) | 26 (7.72) |
| **3.Even if I find it painful, I can persist with acupuncture treatment.** | 74 (21.96) | 109 (32.34) | 105 (31.16) | 36 (10.68) | 13 (3.86) |
| **4.Once the pain is relieved, I tend to switch to other therapies instead of continuing acupuncture.** | 25 (7.42) | 56 (16.62) | 87 (25.82) | 91 (27) | 78 (23.15) |
| **5.I actively recommend acupuncture therapy to fellow patients.** | 83 (24.63) | 120 (35.61) | 84 (24.93) | 27 (8.01) | 23 (6.82) |
| **6.I prefer to receive acupuncture treatment from a specialist rather than a general practitioner.** | 98 (29.08) | 107 (31.75) | 82 (24.33) | 34 (10.09) | 16 (4.75) |
